# Supplementary material
Source: PubMed Central journal article supplement (PMC3443314)
Supplement: NIHMS391850-supplement-1.pdf [file NIHMS391850-supplement-1.pdf]

## Supplementary Results

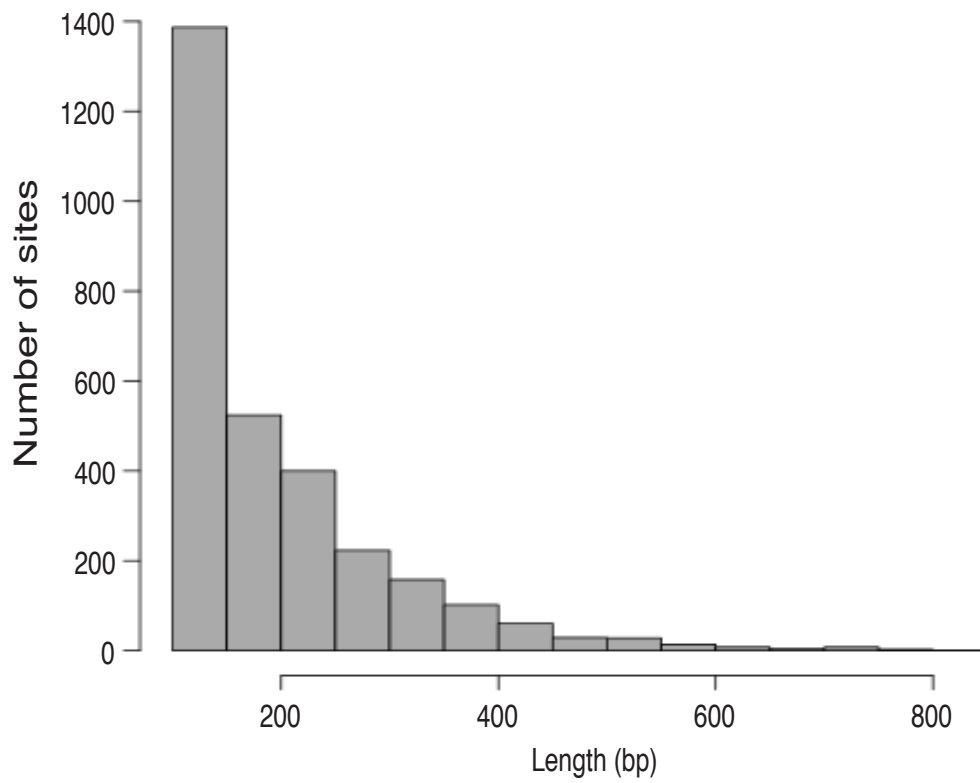

**Supplementary Figure 1** The size distribution of NRPE1 sites.

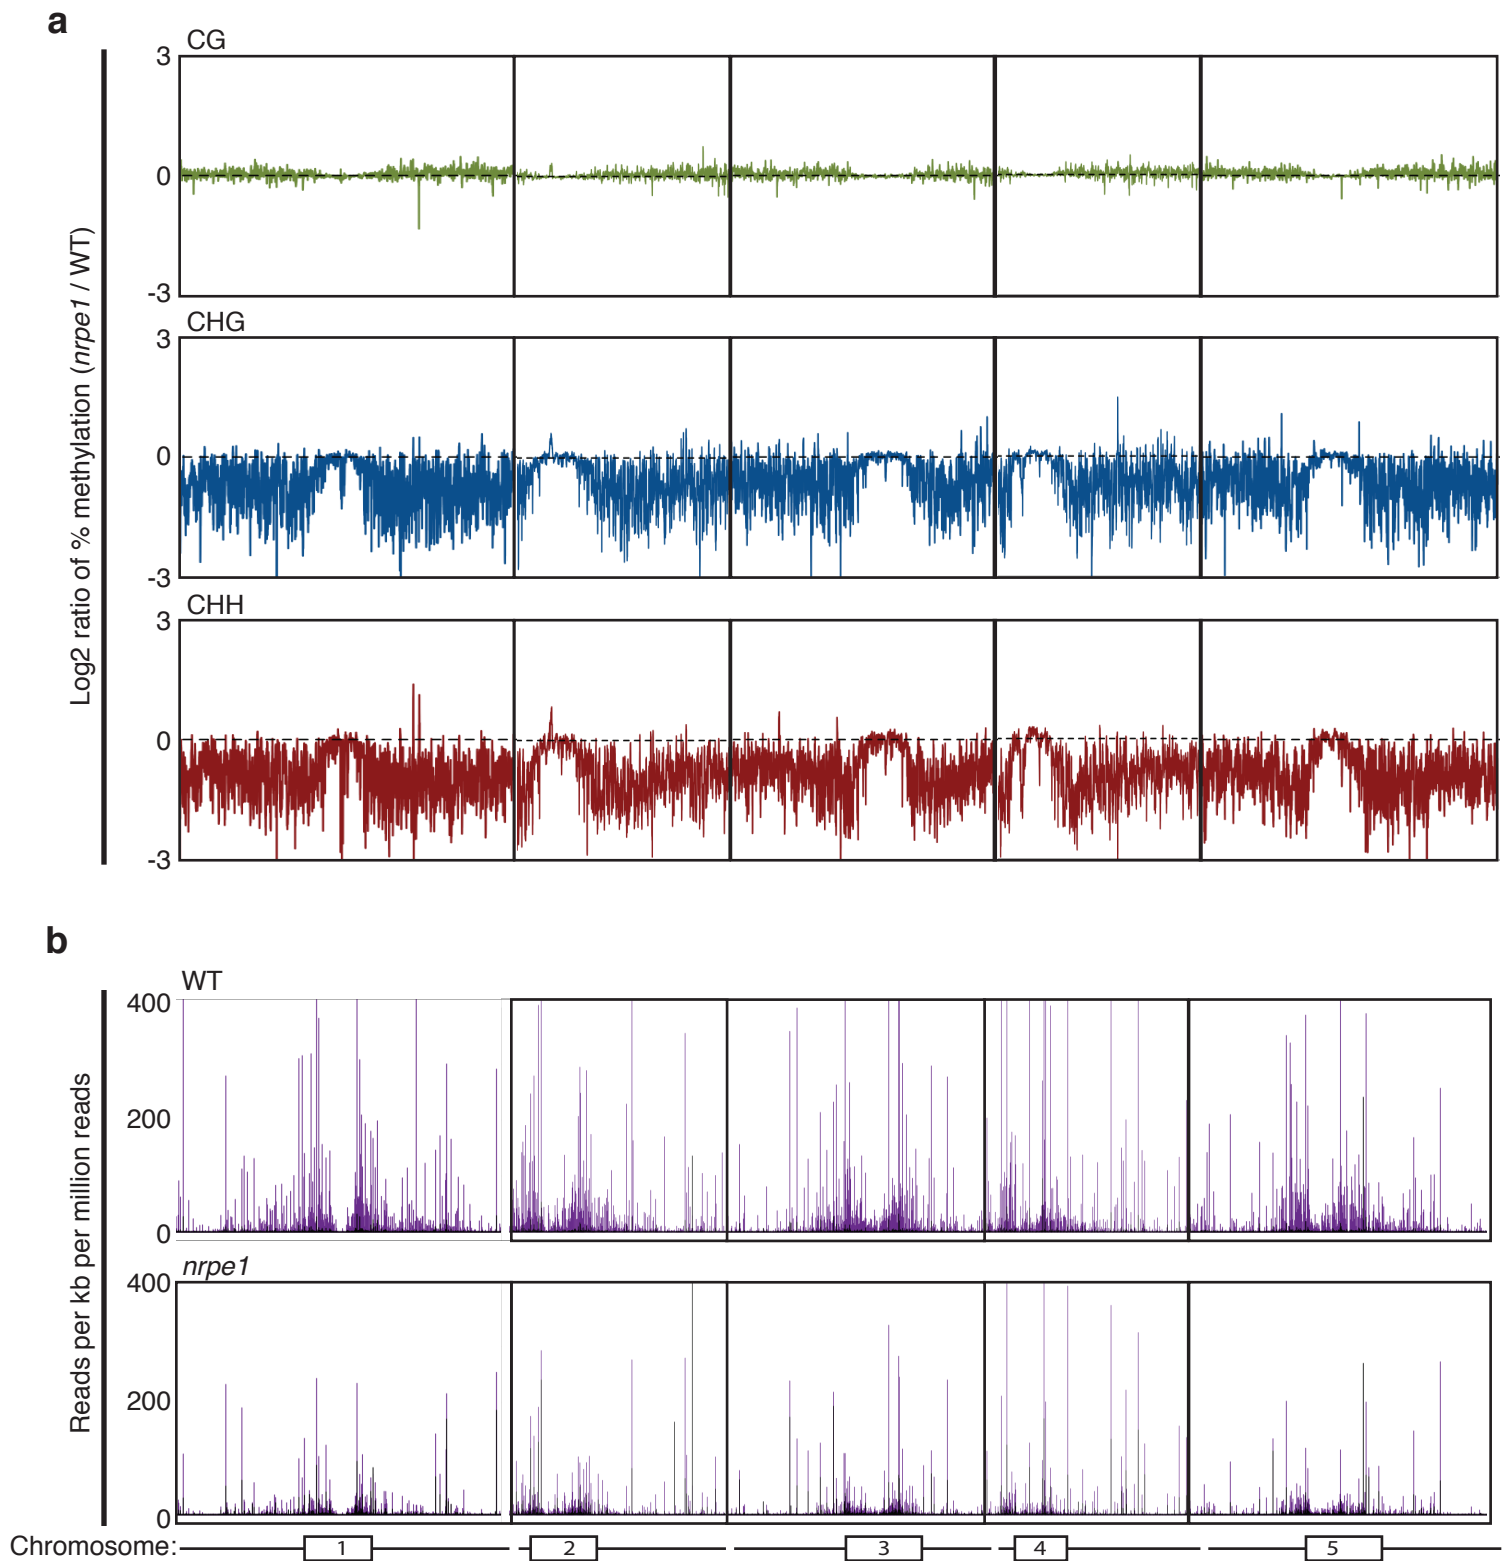

**Supplementary Figure 2** Epigenetic marks in *nrpe1* mutant. **(a)** Chromosomal views of log<sub>2</sub> ratio of methylation levels in all three cytosine contexts for *nrpe1* mutants relative to WT as assayed by whole-genome bisulfite sequencing. **(b)** 24nt (purple) and 21nt (black) small RNA levels in WT and *nrpe1* plants as assayed by small RNA Illumina sequencing. For small RNA abundance, read counts for each library were normalized to number of mapping reads for that library. Schematic representations of chromosomes are shown as in Figure 1A.

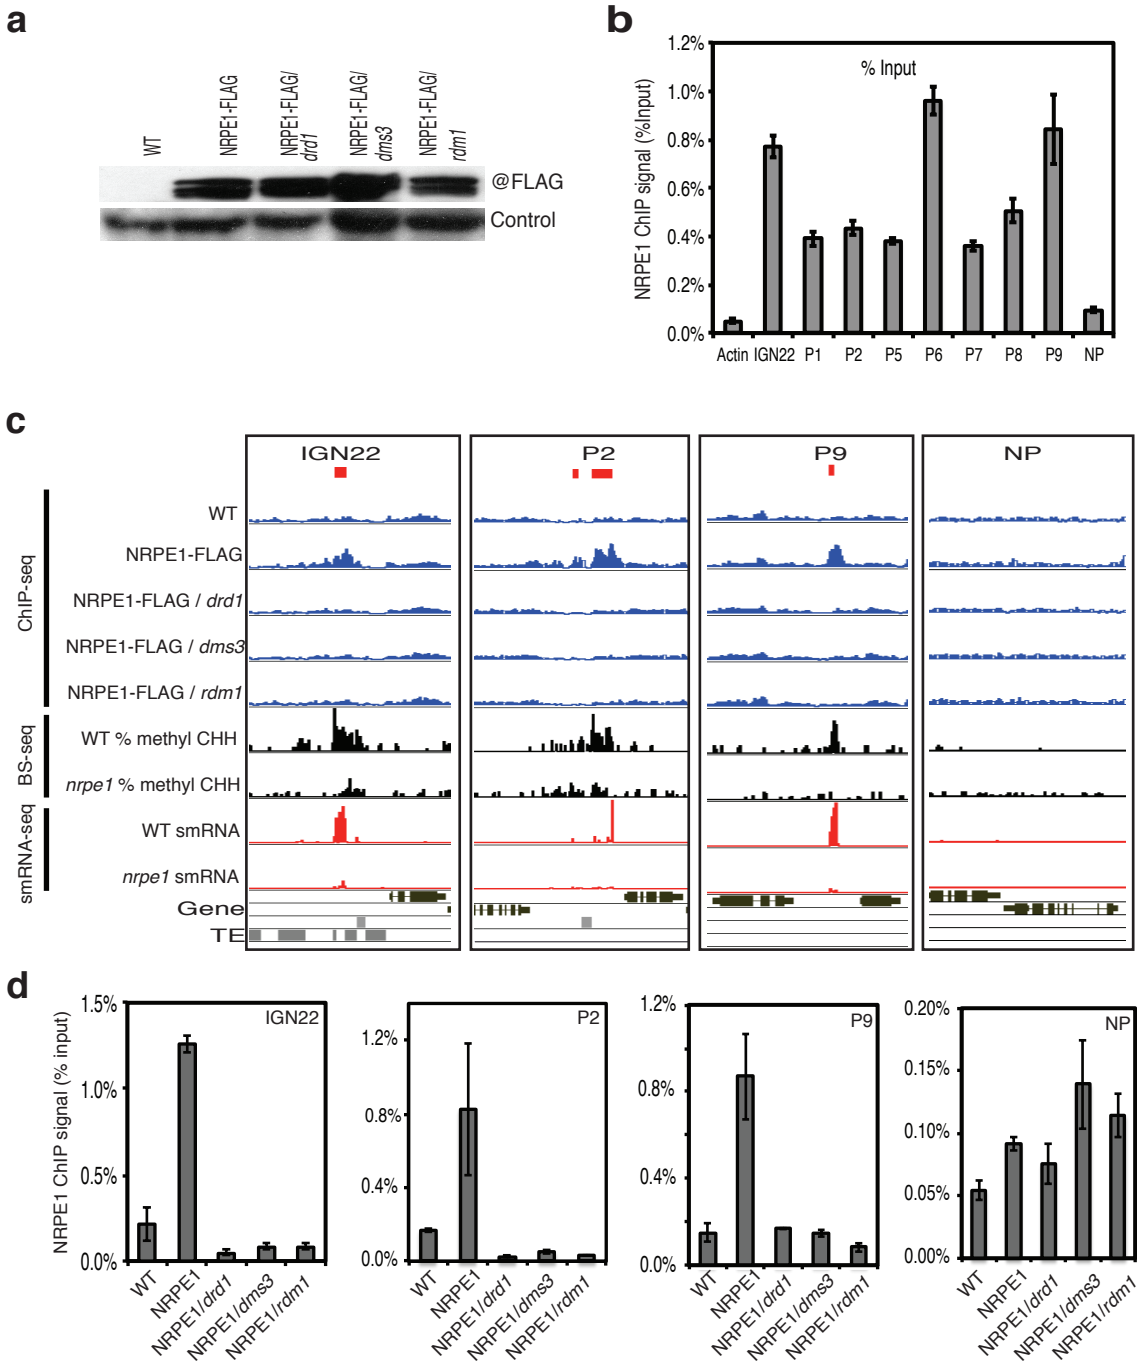

**Supplementary Figure 3** Identification of new Pol V-dependent transcripts. **(a)** Western blot of NRPE1 in DDR mutants with WT as a negative control. **(b)** Validation of ChIP-seq peaks (P#) by qPCR at single loci. IGN22 is a previously described Pol V transcript (ref 13), NP is a region not showing NRPE1 enrichment. **(c)** Genome-browser views of NRPE1 peaks. **(d)** Validation of ChIP-seq data for NRPE1 binding to chromatin in NRPE1, *drd1*, *dms3*, and *rdm1* mutants at IGN22, P2, P9 and NP loci. Error bars represent the standard deviation of three biological replicates.



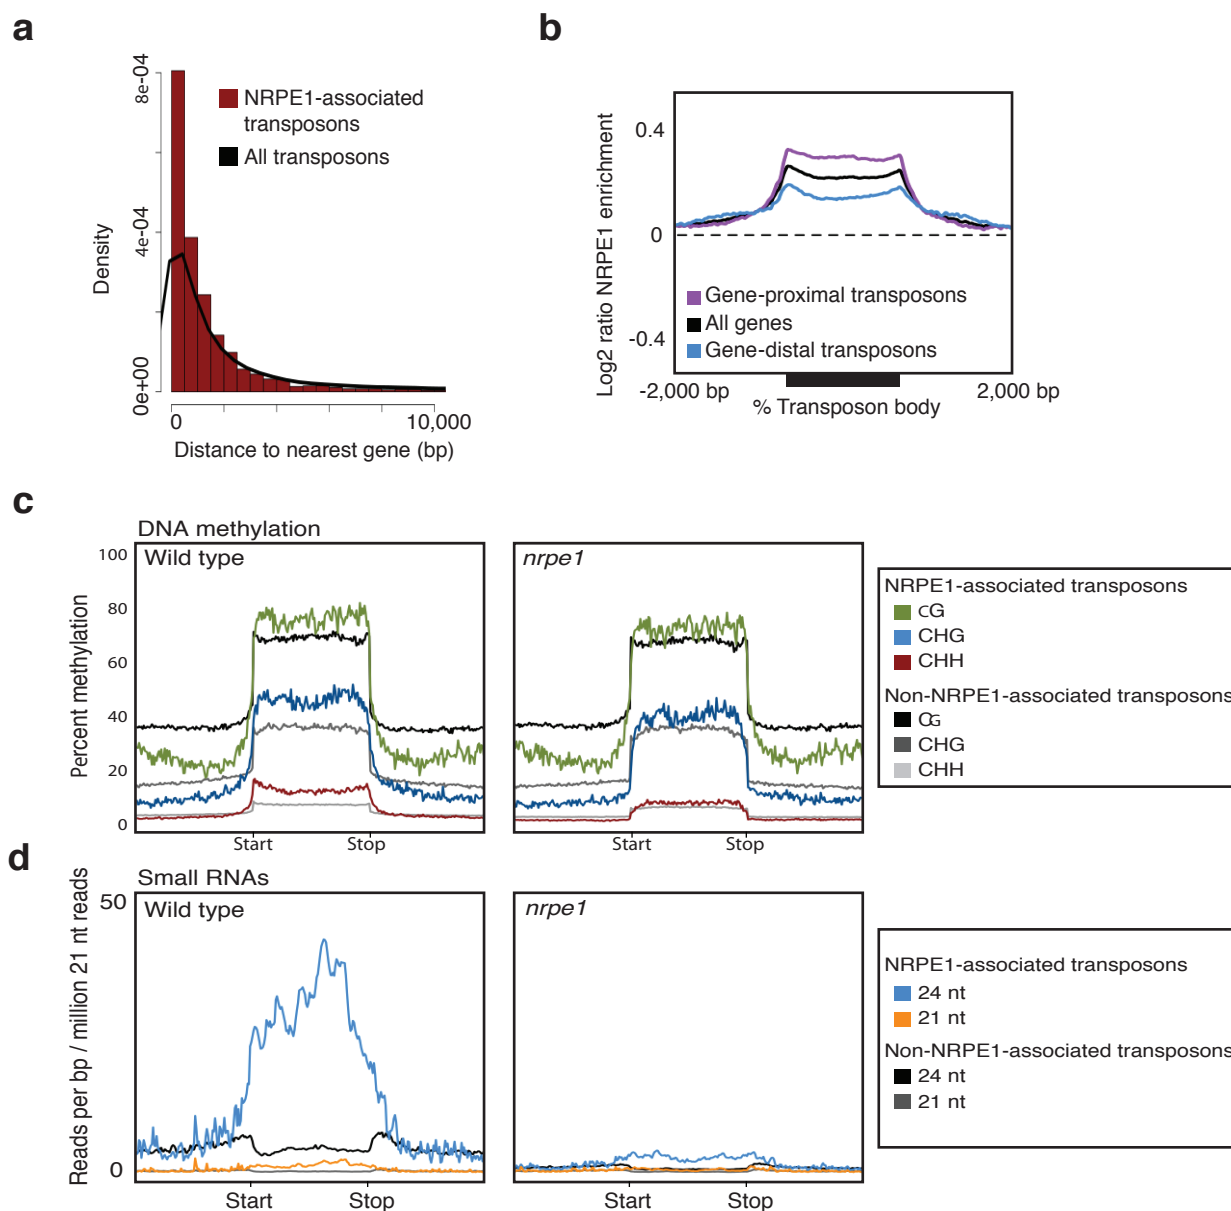

**Supplementary Figure 5** NRPE1 is enriched at gene-proximal transposons that are targets of RdDM. **(a)** Histogram showing the distance between transposons and nearest protein coding gene. **(b)** Metaplot showing NRPE1-enrichment at gene-proximal (within 1 kb) and -distal (>1 kb) transposons. **(c)** Metaplots showing the DNA methylation as assayed by BS-seq at transposons. **(d)** Metaplots of small RNA abundance as assayed by smRNA-seq at transposons. All metaplots extend +/-2000 bp from the body of the transposons.

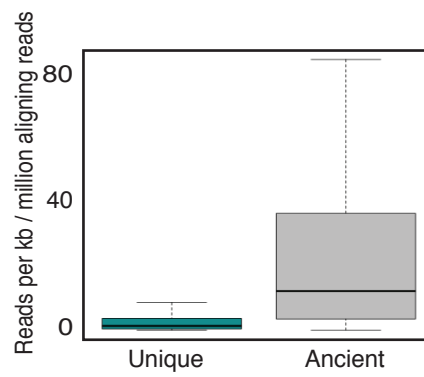

**Supplementary Figure 6** Unique transposons are less transcribed than ancient transposons in wild type plant. Boxplot of RNA-seq reads in wild type showing that unique transposons are generally more lowly expressed than the ancient transposons.

**Supplemental Table 3.** List of primers used for NRPE1 ChIP validation and new IGN transcripts detection by real-time PCR.

|       | Primer numbers     | Primer sequences from 5' to 3'                          |
|-------|--------------------|---------------------------------------------------------|
| Actin | JP2699<br>JP2700   | AGCACGGATCGAATCACATA<br>CTCGCTGCTTCTCGAATCTT            |
| IGN22 | JP9978<br>JP9979   | CGGGTCCTTGGACTCCTGAT<br>TCGTGACCGGAATAATTAATGG          |
| P1    | JP10069<br>JP10070 | GGATGTATATACGACTTTTAG<br>GCTGAAGTGTGGAATCTATATG         |
| P2    | JP10051<br>JP10052 | CTAAAGCCCATCAGAGAAACC<br>GCTTTGATTGTTTTAACCGGTG         |
| P5    | JP10079<br>JP10080 | CCCCAAATCAAATCTCACCC<br>CTCTATATTTTGTATATTAATTCC        |
| P6    | JP10059<br>JP10060 | GGCTTCGATAGGAAGAATGCC<br>GTGAAACTGCCAGATCCAAATTC        |
| P7    | JP10053<br>JP10054 | GTCCGTTGGAGATTCTATTGCC<br>GATGGATGATATATTCTATATTTG      |
| P8    | JP10073<br>JP10074 | GAAAACAAAAGTTATACTTTG<br>GGTGTTCATTCACTATCGTCC          |
| P9    | JP10075<br>JP10076 | CCGTTTCTGGGTAGGTCGGC<br>CCAATTCTTGACTGGAGTGGAC          |
| NP    | JP10081<br>JP10082 | GTTCAATGAATAAGAATCACTGAG<br>CCATGTCTTGTGCATTGTCAGAATCAG |

**Supplemental Table 4.** Illumina sequencing library statistics.

| <b>ChIP-seq</b>      | <b>Library</b>           | <b>Mapping</b> | <b>Mapping Uniquely</b> | <b>Mapping Non-unique</b> |
|----------------------|--------------------------|----------------|-------------------------|---------------------------|
|                      | NRPE1-FLAG               | 61748706       | 53323310                | 8425396                   |
|                      | WT(Columbia)             | 90457956       | 79443656                | 11014300                  |
|                      | NRPE1-FLAG replicate     | 19056215       | 15975032                | 3081183                   |
|                      | NRPE1-FLAG ; <i>drd1</i> | 28602282       | 25137147                | 3465135                   |
|                      | NRPE1-FLAG ; <i>rdm1</i> | 24907986       | 22080393                | 2827593                   |
|                      | NRPE1-FLAG ; <i>idn1</i> | 26664363       | 23412699                | 3251664                   |
|                      | WT(Columbia) replicate   | 25696190       | 21832253                | 3863937                   |
| <b>BS-seq*</b>       | <b>Library</b>           | <b>Mapping</b> | <b>Mapping Uniquely</b> | <b>Mapping Non-unique</b> |
|                      | WT(Columbia)             | -              | 34759527                | -                         |
|                      | <i>nrpe1</i>             | -              | 50979638                | -                         |
| <b>small RNA-seq</b> | <b>Library</b>           | <b>Mapping</b> | <b>Mapping Uniquely</b> | <b>Mapping Non-unique</b> |
|                      | WT(Columbia)             | 4464770        | 1897762                 | 2567008                   |
|                      | <i>nrpe1</i>             | 8248924        | 2680443                 | 5568481                   |

\*For BS-seq libraries, only uniquely mapping read counts were recorded from the BSseeker wrapper.
